# Supplementary material for: Avoiding high ozone pollution in Delhi, India
Source: Royal Society of Chemistry journal article supplement (doi:10.1039/d0fd00079e), 2020-08-06
Supplement: d0fd00079e1.pdf [file d0fd00079e1.pdf]

## Supporting Information for

### Avoiding high ozone pollution in Delhi, India

**Ying Chen<sup>\*a</sup>, Gufran Beig<sup>b</sup>, Scott Archer-Nicholls<sup>c</sup>, Will Drysdale<sup>d</sup>, W. Joe F. Acton<sup>a</sup>, Douglas Lowe<sup>e</sup>, Beth Nelson<sup>d</sup>, James Lee<sup>d</sup>, Liang Ran<sup>f</sup>, Yu Wang<sup>e</sup>, Zhijun Wu<sup>g</sup>, Saroj Kumar Sahu<sup>h</sup>, Ranjeet S. Sokhi<sup>i</sup>, Vikas Singh<sup>j</sup>, Ranu Gadi<sup>k</sup>, C. N. Hewitt<sup>a</sup>, Eiko Nemitz<sup>l</sup>, Alex Archibald<sup>c</sup>, Gordon McFiggans<sup>e</sup>, Oliver Wild<sup>\*a</sup>**

<sup>a</sup>Lancaster Environment Centre, Lancaster University, Lancaster, UK

<sup>b</sup>Indian Institute of Tropical Meteorology, Pune, India

<sup>c</sup>NCAS-Climate, Department of Chemistry, University of Cambridge, Cambridge, UK

<sup>d</sup>Wolfson Atmospheric Chemistry Laboratories, University of York, United Kingdom

<sup>e</sup>Centre for Atmospheric Sciences, Department of Earth and Environmental Sciences, University of Manchester, Manchester, UK

<sup>f</sup>Key Laboratory of Middle Atmosphere and Global Environment Observation, Institute of Atmospheric Physics, Chinese Academy of Sciences, Beijing, China

<sup>g</sup>State Key Joint Laboratory of Environmental Simulation and Pollution Control, College of Environmental Sciences and Engineering, Peking University, Beijing, China

<sup>h</sup>Environmental Science, Department of Botany, Utkal University, Bhubaneswar, India

<sup>i</sup>Centre for Atmospheric and Climate Physics Research, University of Hertfordshire, Hatfield, Hertfordshire, UK

<sup>j</sup>National Atmospheric Research Laboratory, Gadanki, AP, India

<sup>k</sup>Indira Gandhi Delhi Technical University for Women, Kashmere Gate, Delhi, India

<sup>l</sup>UK Centre for Ecology & Hydrology, UKCEH, Bush Estate, Penicuik, UK

*\*Email: Ying Chen (y.chen65@lancaster.ac.uk); Oliver Wild (o.wild@lancaster.ac.uk)*

#### Contents of this file:

**Figure S1** – Diurnal pattern of effective emissions;

**Figure S2** – Non-linear relationship between NO<sub>x</sub>-VOC-O<sub>3</sub> in June, Delhi;

**Figure S3** – A tomogram of non-linear AOD-NO<sub>x</sub>-VOC-O<sub>3</sub> relationship;

**Figure S4** – The changes of hourly peak ozone concentration over Delhi region, with respect to reduction of emissions from different sectors

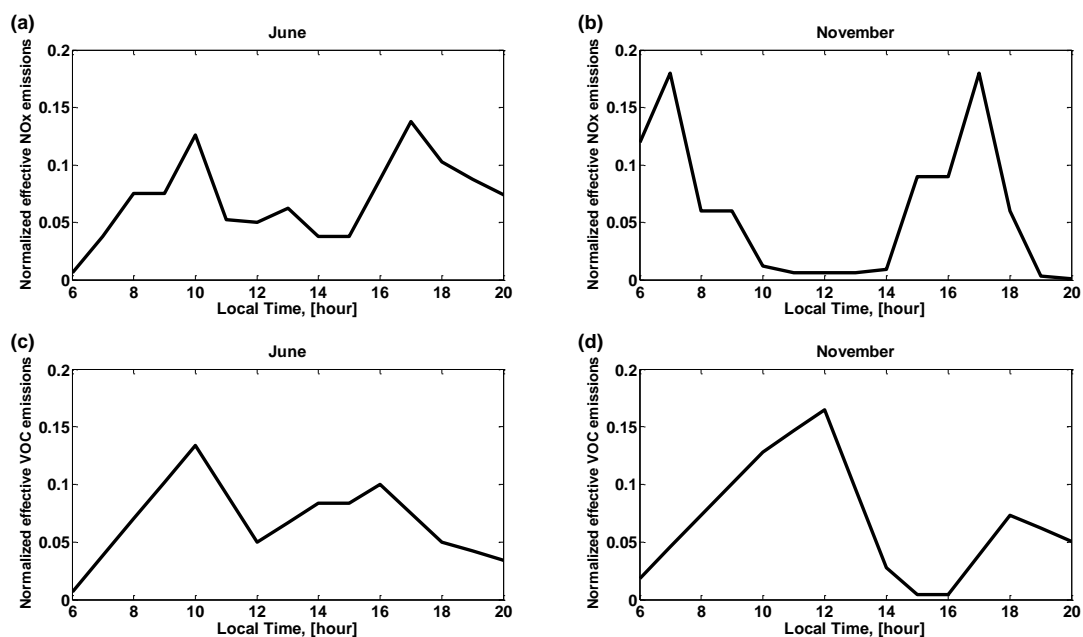

**Figure S1. Diurnal pattern of effective emissions.** (a) NO<sub>x</sub> in June, (b) NO<sub>x</sub> in November, (c) VOC in June, and (d) VOC in November. Only a limited number of VOC species are measured, and therefore we use toluene emissions as a proxy to represent the ozone produce potential of anthropogenic VOCs emissions.

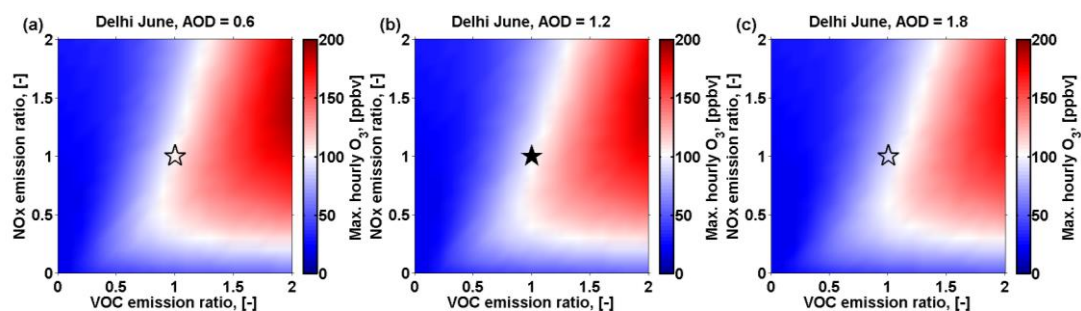

**Figure S2. Non-linear relationship between NO<sub>x</sub>-VOC-O<sub>3</sub> in June 2018, Delhi.** (a) AOD=0.6; (b) AOD=1.2; (c) AOD=1.8. The base-case is marked by a black solid star. The sensitivity cases, with changes in AOD but not in NO<sub>x</sub> or VOC emissions, are marked by black hollow stars.

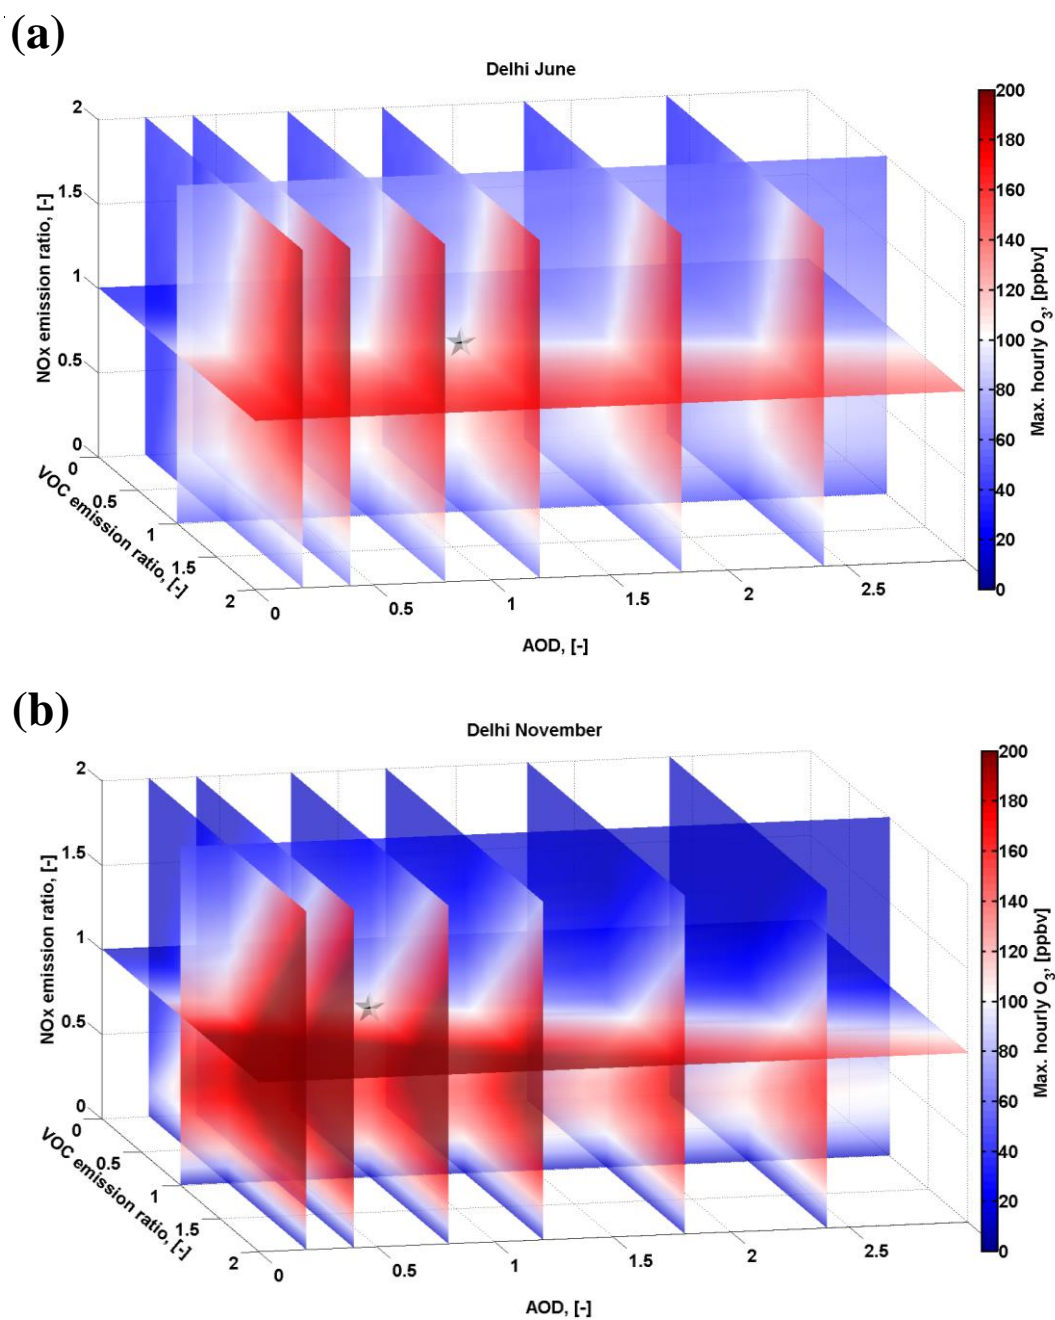

**Figure S3. A tomogram of non-linear AOD-NO<sub>x</sub>-VOC-O<sub>3</sub> relationship.** The colours indicate maximum hourly ozone concentration, as a function of NO<sub>x</sub> emission, VOC emission and AOD. (a) June; (b) November. The base case is marked by a black star at the center.

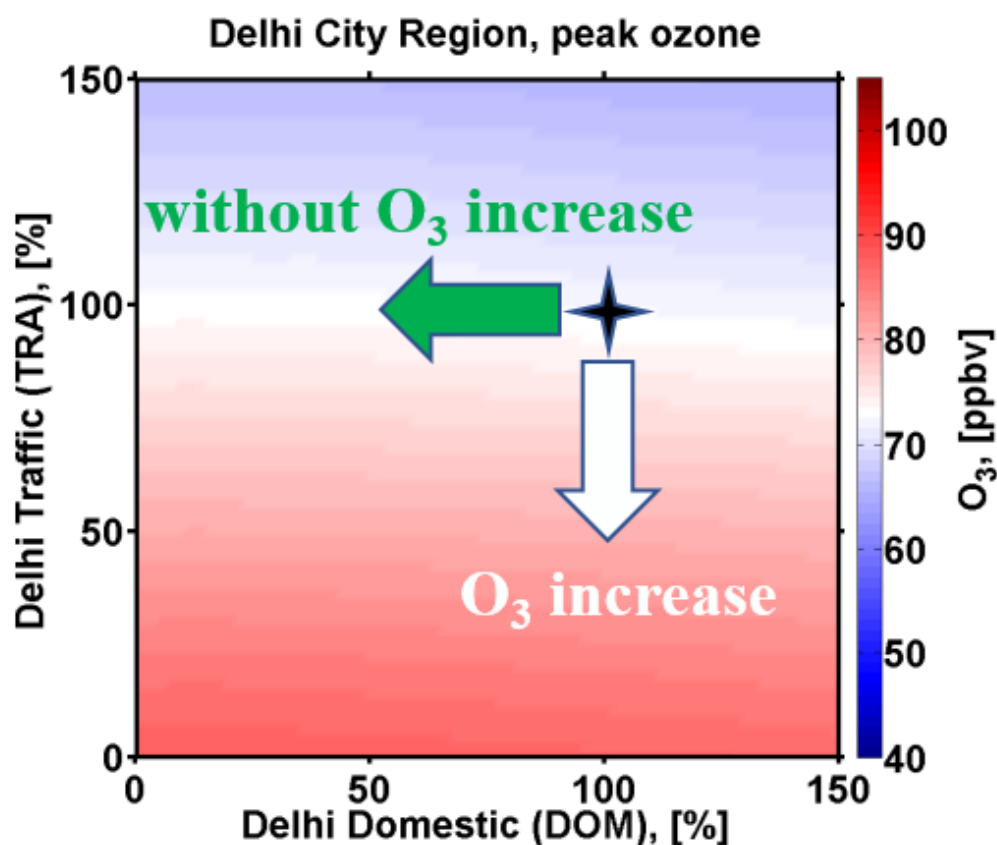

**Figure S4.** The changes of hourly peak ozone concentration over Delhi region, with respect to reduction of emissions from different sectors. Source from Chen et al. (2020), re-use authorized according to the Creative Commons Attribution 4.0 License.

#### Supplementary References:

Chen, Y., Wild, O., Ryan, E., Sahu, S. K., Lowe, D., Archer-Nicholls, S., Wang, Y., McFiggans, G., Ansari, T., Singh, V., Sokhi, R. S., Archibald, A., and Beig, G.: Mitigation of PM<sub>2.5</sub> and ozone pollution in Delhi: a sensitivity study during the pre-monsoon period, *Atmos. Chem. Phys.*, 20, 499-514, 10.5194/acp-20-499-2020, 2020.
